# Supplementary material
Source: HighWire-hosted journal article supplement (https://erj.ersjournals.com/content/49/2/1601014)
Supplement: inline-supplementary-material-1 [file inline-supplementary-material-1.pdf]

Supplementary tables S1-S3

| Table S1. Exclusion of asthma patients with potential pulmonary differential diagnosis |                    |               |          |
|----------------------------------------------------------------------------------------|--------------------|---------------|----------|
|                                                                                        | ICD-10             | ICD-9         | ICD_8    |
| Chronic obstructive pulmonary diseases (COPD)                                          | J41, J42, J43, J44 | 491, 492, 496 | 491, 492 |
| Bronchiectasis                                                                         | J47                | 494           | 518      |
| Interstitial lung diseases (e.g. pneumoconiosis, and pneumonitis)                      | J60-J70            | 495, 500-508  | 515-517  |

| Table S2. Definition of comorbidities.                                                                                        |                                |                         |                  |
|-------------------------------------------------------------------------------------------------------------------------------|--------------------------------|-------------------------|------------------|
| Comorbidity                                                                                                                   | ICD-10                         | ICD-9                   | ICD-8            |
| Atrial fibrillation/flutter*                                                                                                  | I48                            | 427D                    | 427.92           |
| Obesity*                                                                                                                      | E65, E66                       | 278A, 278B              | 277.99           |
| Psychiatric disease*                                                                                                          | F10-F99                        | 290-319                 | 290-315          |
| CHD*                                                                                                                          | I20-I25                        | 410-414                 | 410-414          |
| Congestive heart failure*                                                                                                     | I50                            | 428                     | 427.00, 427.10,  |
| Peripheral vascular disease*                                                                                                  | I60-I69                        | 430-438                 | 430-438          |
| Cerebrovascular disease*                                                                                                      | K70-K74                        | 571                     | 571              |
| Varicose varices*                                                                                                             | I83                            | 454                     | 454              |
| Inflammatory bowel disease*                                                                                                   | K50, K51                       | 555,556                 | 563              |
| Pregnancy or delivery**                                                                                                       | O00-O99                        | 630-676                 | 630-678          |
| Fractures / trauma**                                                                                                          | S00-S99,<br>T00-T14            | 800-929, 950-959        | 800-929, 950-959 |
| Cancer***                                                                                                                     | C00-C99                        | 140-208                 | 140-209          |
|                                                                                                                               |                                |                         |                  |
|                                                                                                                               | Surgery codes 1997-2010        | Surgery codes 1964-1996 |                  |
| Surgery**                                                                                                                     | AAA-ZZZ (followed by 2 digits) | 0000-8999               |                  |
| *Any time before index date. ** Within 90 days before index date. ***5 years before index date and one year after index date. |                                |                         |                  |

| Number of asthma hospitalisations. | <b>Table S3. Odds ratios (OR) for PE (pulmonary embolism), DVT (deep venous thrombosis), and PD (combined PE and DVT) according to number of hospitalisations for asthma</b> |         |      |           |         |      |
|------------------------------------|------------------------------------------------------------------------------------------------------------------------------------------------------------------------------|---------|------|-----------|---------|------|
|                                    | Crude                                                                                                                                                                        |         |      | Adjusted* |         |      |
|                                    | OR                                                                                                                                                                           | 95 % CI |      | OR        | 95 % CI |      |
| PE                                 |                                                                                                                                                                              |         |      |           |         |      |
| 1--2                               | 1,47                                                                                                                                                                         | 1,39    | 1,56 | 1,34      | 1,26    | 1,41 |
| 3--4                               | 1,65                                                                                                                                                                         | 1,47    | 1,85 | 1,42      | 1,27    | 1,60 |
| >4                                 | 2,09                                                                                                                                                                         | 1,89    | 2,31 | 1,82      | 1,64    | 2,02 |
| DVT                                |                                                                                                                                                                              |         |      |           |         |      |
| 1--2                               | 1,51                                                                                                                                                                         | 1,42    | 1,62 | 1,43      | 1,33    | 1,53 |
| 3--4                               | 1,74                                                                                                                                                                         | 1,51    | 2,00 | 1,62      | 1,40    | 1,87 |
| >4                                 | 2,34                                                                                                                                                                         | 2,07    | 2,64 | 2,19      | 1,94    | 2,49 |
| PD                                 |                                                                                                                                                                              |         |      |           |         |      |
| 1--2                               | 1,66                                                                                                                                                                         | 1,33    | 2,08 | 1,59      | 1,26    | 2,00 |
| 3--4                               | 1,86                                                                                                                                                                         | 1,19    | 2,92 | 1,63      | 1,03    | 2,59 |
| >4                                 | 1,93                                                                                                                                                                         | 1,22    | 3,06 | 1,75      | 1,09    | 2,81 |

\*Adjusted for atrial fibrillation, obesity, psychiatric disease, CHD, heart failure, peripheral vascular disease, cerebrovascular disease, varicose veins, inflammatory bowel disease, pregnancy/delivery, fractures/trauma, and surgery.
